# Supplementary material
Source: Springer Nature journal article supplement (https://www.springermedizin.de/resource/supplementary/13256_2011_1932_MOESM1_ESM.pdf/9648750)
Supplement: MOESM1 [file 9648750]

(week 0) Fluoxetine 20 mg/day, Clonazepam 0.5 mg/day, CBT\*

Clonazepam tapered-off over 3 weeks

(week 8) Fluoxetine 80 mg/day, CBT\* → minimal improvement\*\*

(Started on Bupropion-SR 150 mg/day)

Fluoxetine tapered-off over 3 weeks (by week 11)

(week 10) → Bupropion-SR increased to 300 mg/day, CBT\*

(week 12) → mild improvement\*\*

Bupropion-SR increased to 450 mg/day, CBT\*

(week 13) → much improvement\*\*

(week 24, 6 months) → much improvement\*\*

(week 48, 12 months) → very much improved\*\*

Bupropion-SR 450 mg/day and CBT\* continued
